# Supplementary material for: Biochemical Characterization of a Mycobacteriophage Derived DnaB Ortholog Reveals New Insight into the Evolutionary Origin of DnaB Helicases
Source: PLOS journal article supplement (doi:10.1371/journal.pone.0134762), 2015-08-03
Supplement: S5 (10.1371/journal.pone.0134762.s005) [file journal.pone.0134762.s005]

**S5 Figure**

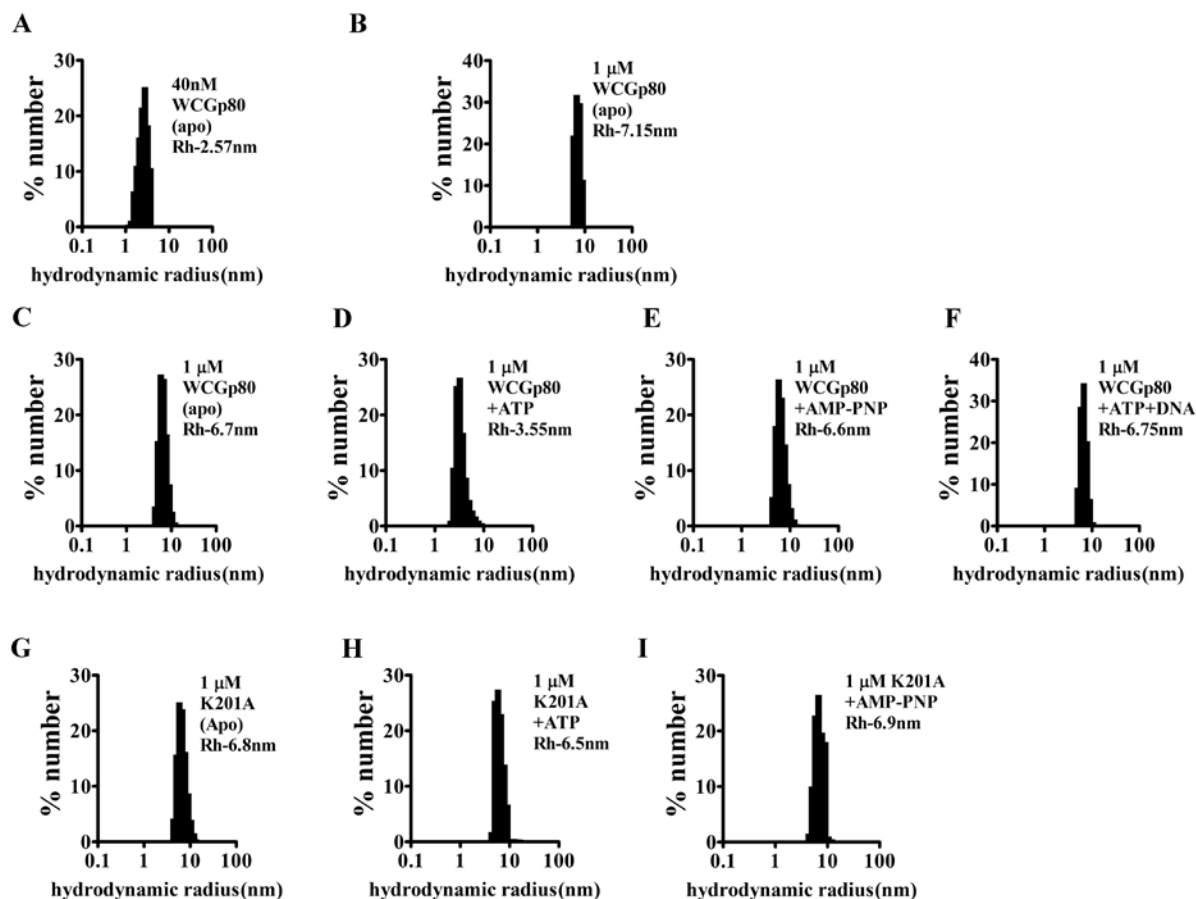

**S5 Figure.** . Distribution of hydrodynamic radii ( $R_h$ ) of the native proteins either WCGp80 (A-F) or WCGp80(K201A) (G to I) as determined by performing DLS experiments. Experiments were performed in the absence of cofactors (apo enzyme) or in the presence of either ATP or AMP-PNP (4 mM) or DNA (100 nM) or combinations thereof. The concentrations of the proteins used were 1 $\mu$ M in all cases except for (A) where the protein was diluted to 40 nM. The panels shown represent the results of a single set of experiment. For quantitative interpretation, the weighted average of the  $R_h$  was determined. The results presented in Figs. 3, E and F are based on three such experiments.
